# Supplementary material for: Capacitive behaviour of functionalized carbon nanotube/ZnO composites coated on a glassy carbon electrode
Source: Royal Society of Chemistry journal article supplement (doi:10.1039/c5ta01725d), 2015-01-01
Supplement: c5ta01725d1.pdf [file c5ta01725d1.pdf]

### Supplementary information

#### Capacitive behaviour of functionalized carbon nanotube/ZnO composites coated on glassy carbon electrode

Jagruti S. Suroshe and Shivram S. Garje\*

Department of Chemistry, University of Mumbai, Vidyanagari, Santacruz (East), Mumbai-400 098, India

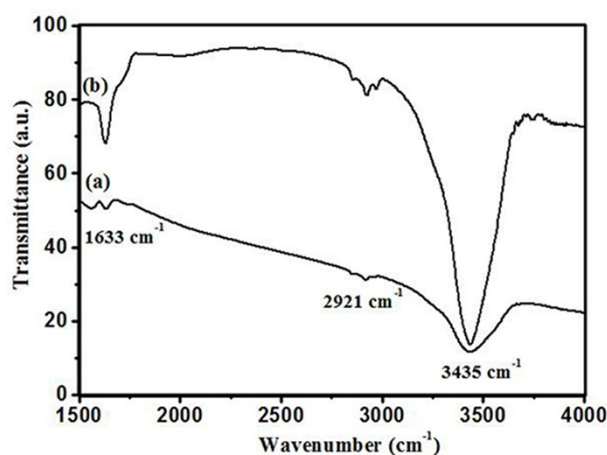

**Fig. S<sub>1</sub>:** FTIR spectra of (a) untreated MWCNTs and (b) Functionalized MWCNTs (FCNTs) after acid treatment with concentrated HNO<sub>3</sub> for 2 h.

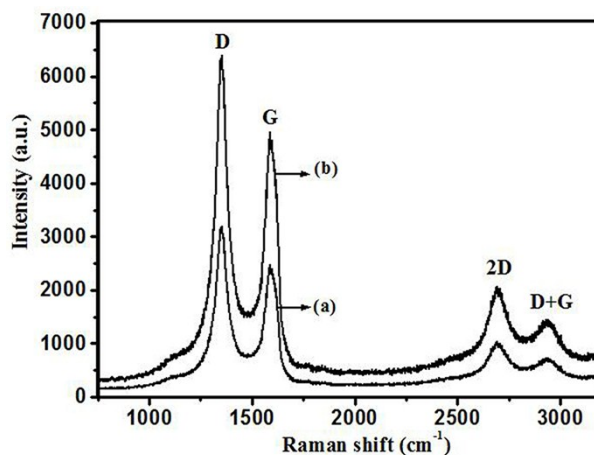

**Fig. S<sub>2</sub>:** Raman spectra of (a) Untreated MWCNTs and (b) FCNTs.

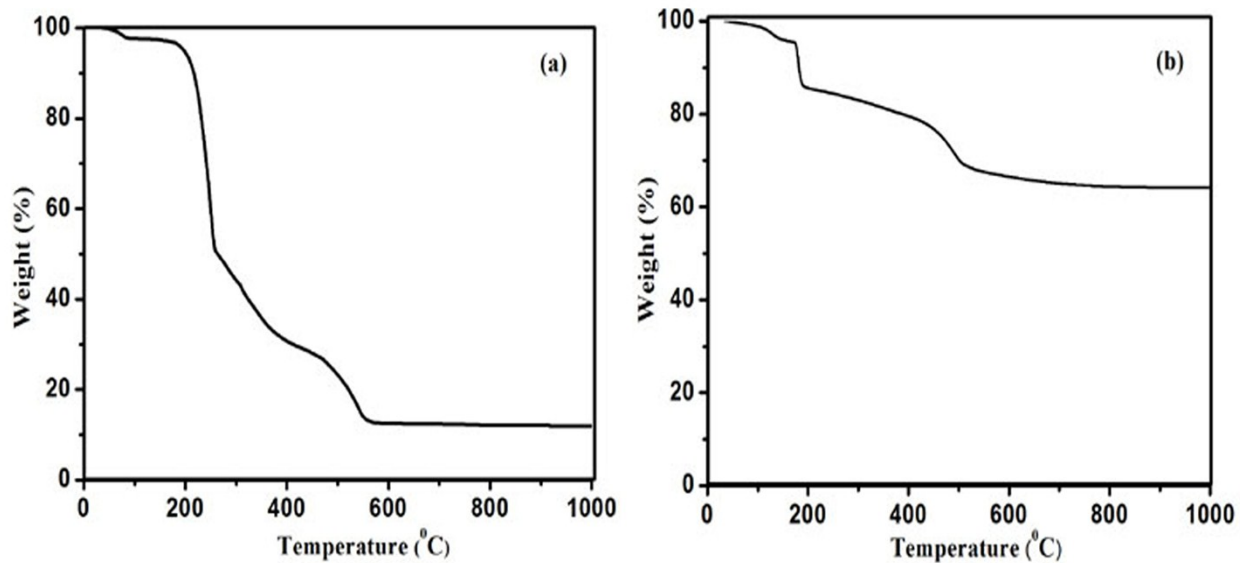

**Fig. S<sub>3</sub>** : TGA pattern of (a) ZnCl<sub>2</sub> (benzscz)<sub>2</sub> and (b) ZnO NPs in air at heating rate 10<sup>0</sup>C min<sup>-1</sup>.

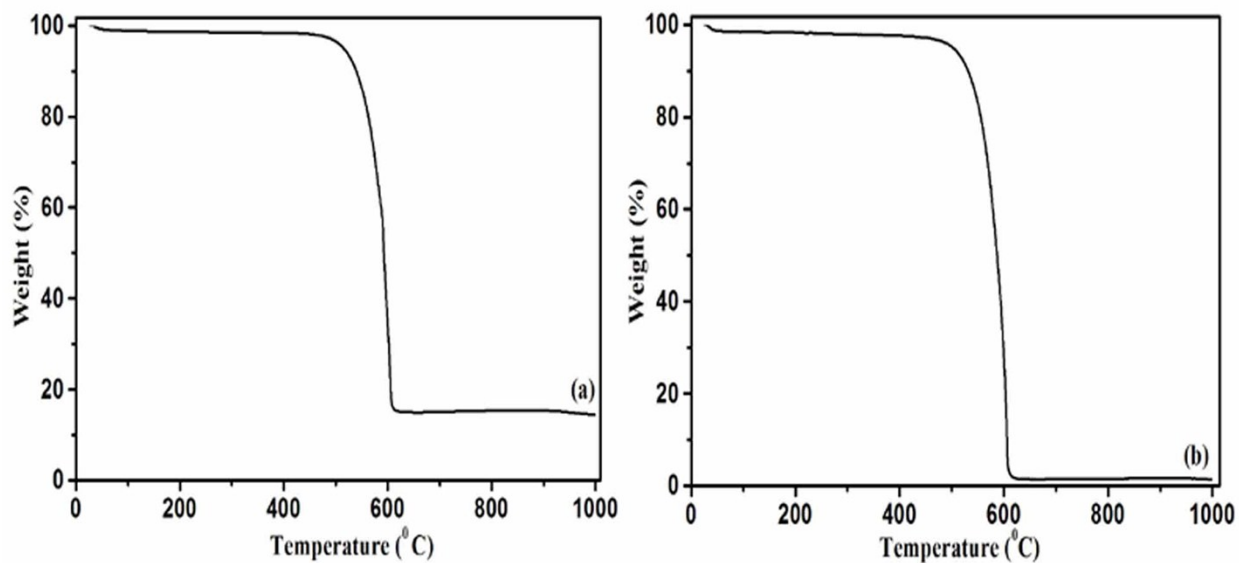

**Fig. S<sub>4</sub>** : TGA of (a) Untreated MWCNTs and (b) FCNTs under air at heating rate 10<sup>0</sup>C min<sup>-1</sup>.

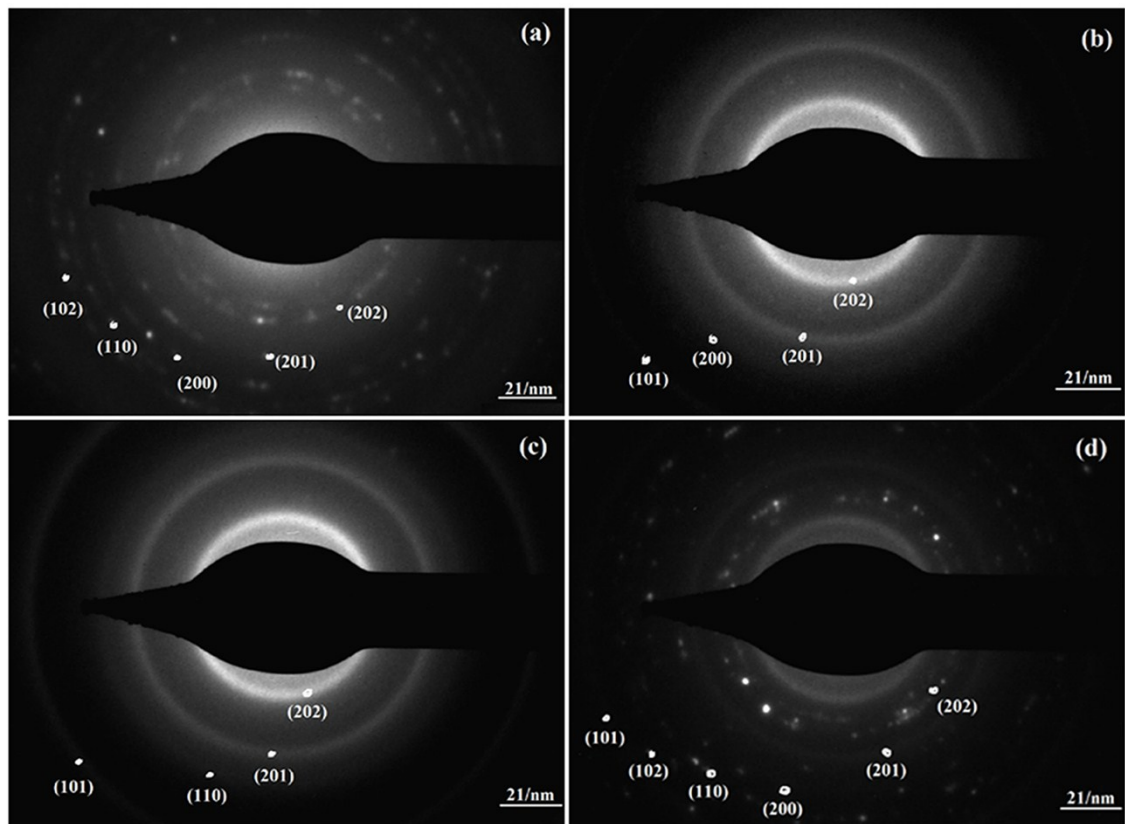

**Fig. S<sub>5</sub>:** SAED patterns of (a) ZnO NPs, (b) FZ-1, (c) FZ-2 and (d) FZ-3 composites.

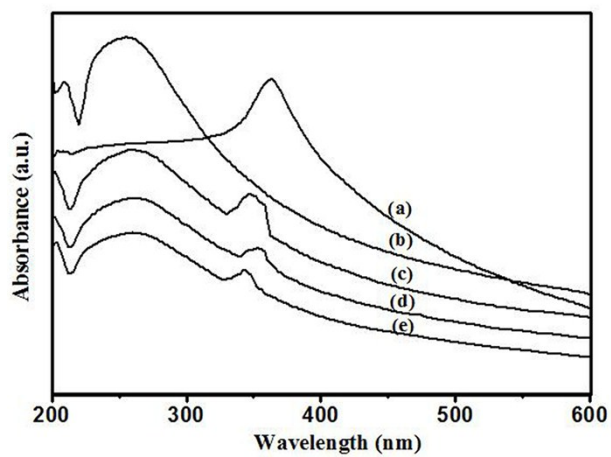

**Fig. S<sub>6</sub>:** UV-Visible spectra of (a) ZnO NPs, (b) FCNT, (c) FZ-2, (d) FZ-1 and (e) FZ-3.

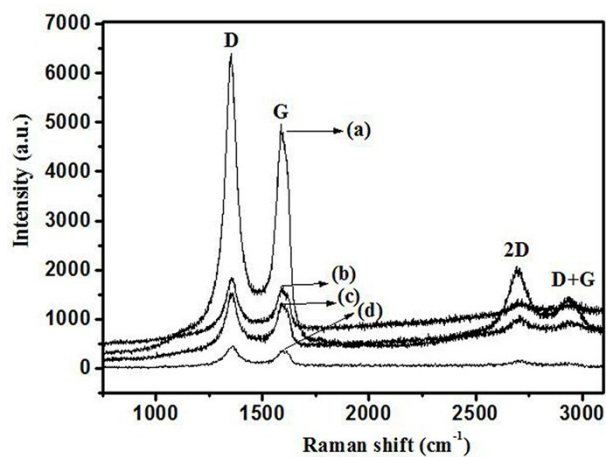

**Fig. S7:** Raman spectra of (a) FCNT, (b) FZ-1, (c) FZ-2 and (d) FZ-3 composites.

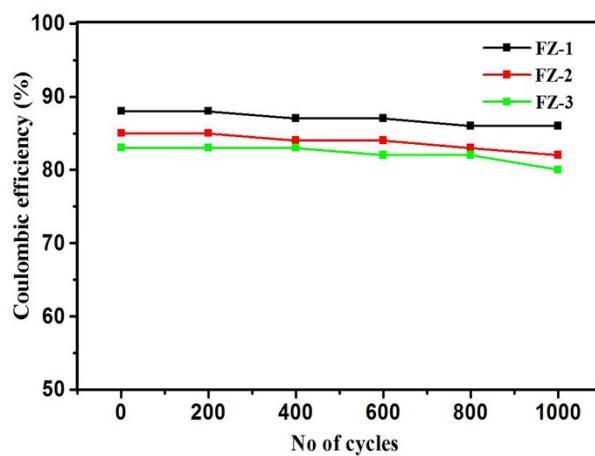

**Fig. S8:** Variation in coulombic efficiency of composites with no of cycles.
